# Supplementary material
Source: PubMed Central journal article supplement (PMC3514525)
Supplement: mmc1.pdf [file mmc1.pdf]

# Crosstalk and competition in signaling networks

## Supporting Material

Michael Rowland<sup>1</sup>, Walter Fontana<sup>2</sup> and Eric J. Deeds<sup>1,3</sup>

<sup>1</sup>Center for Bioinformatics, The University of Kansas, 2030 Becker Dr., Lawrence, KS 66047, USA

<sup>2</sup>Department of Systems Biology, Harvard Medical School, 200 Longwood Avenue, Boston MA 02115, USA

<sup>3</sup>Department of Molecular Biosciences, The University of Kansas, 2030 Becker Dr., Lawrence, KS 66047, USA

Email: Michael Rowland - mrowland@ku.edu; Walter Fontana - walter@hms.harvard.edu; Eric Deeds - deeds@ku.edu;

## Contents

|          |                                                                                    |           |
|----------|------------------------------------------------------------------------------------|-----------|
| <b>1</b> | <b>Systems of Ordinary Differential Equations</b>                                  | <b>3</b>  |
| 1.1      | 1–Kinase/1–Phosphatase Loop with 2 Substrates . . . . .                            | 3         |
| 1.2      | 1–Kinase/1–Phosphatase Loop with Many Substrates . . . . .                         | 4         |
| 1.3      | 1–Kinase/2–Phosphatase Loop . . . . .                                              | 7         |
| 1.4      | 2–Kinase/1–Phosphatase Loop . . . . .                                              | 8         |
| 1.5      | Cascade with Multiple Phosphatases . . . . .                                       | 10        |
| 1.6      | Cascade with a Single Phosphatase . . . . .                                        | 13        |
| <b>2</b> | <b>Analytical Results for the 1–Kinase/1–Phosphatase Loop</b>                      | <b>16</b> |
| 2.1      | Mutual inhibition for competitive substrates . . . . .                             | 16        |
| 2.2      | Steady-state solution for $[S_1^*]$ . . . . .                                      | 17        |
| 2.3      | $dS_1^*/dS_2^*$ is always positive . . . . .                                       | 18        |
| <b>3</b> | <b>Analytical Results for the 1–Kinase/1–Phosphatase Loop with Many Substrates</b> | <b>21</b> |
| <b>4</b> | <b>Analytical Results for the 1–Kinase/2–Phosphatase Loop</b>                      | <b>22</b> |
| 4.1      | $d[S_2]/d[S_2]_0$ is always positive . . . . .                                     | 23        |
| 4.2      | $dS_1^*/d[S_2]_0$ is always negative . . . . .                                     | 24        |
| <b>5</b> | <b>Analytical Results for the 2–Kinase/1–Phosphatase Loop</b>                      | <b>25</b> |
| 5.1      | $d[S_2^*]/d[S_2]_0$ is always positive . . . . .                                   | 25        |
| 5.2      | $dS_1^*/d[S_2]_0$ is always positive . . . . .                                     | 26        |



# 1 Systems of Ordinary Differential Equations

## 1.1 1–Kinase/1–Phosphatase Loop with 2 Substrates

The set of enzymatic reactions for the 1K1P loop with two substrates is as in equation [2] of the main text:

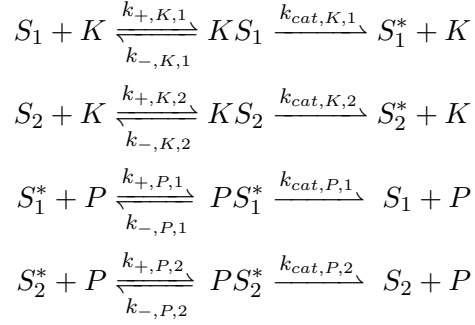

Each contain three rates: rate of complex formation, ( $k_+$ ), rate of complex dissociation ( $k_-$ ), and catalytic rate ( $k_{cat}$ ). The set of ODEs describing the free enzymes are:

$$\begin{aligned}
 \frac{d[K]}{dt} &= - ([S_1] \cdot [K] \cdot k_{+,K,1} + [S_2] \cdot [K] \cdot k_{+,K,2}) + ([KS_1] \cdot (k_{-,K,1} + k_{cat,K,1}) + [KS_2] \cdot (k_{-,K,2} + k_{cat,K,2})) \\
 \frac{d[P]}{dt} &= - ([S_1^*] \cdot [P] \cdot k_{+,P,1} + [S_2^*] \cdot [P] \cdot k_{+,P,2}) + ([PS_1^*] \cdot (k_{-,P,1} + k_{cat,P,1}) + [PS_2^*] \cdot (k_{-,P,2} + k_{cat,P,2}))
 \end{aligned}$$

The set of ODEs describing the unmodified substrates are:

$$\begin{aligned}
 \frac{d[S_1]}{dt} &= - ([S_1] \cdot [K] \cdot k_{+,K,1}) + ([KS_1] \cdot k_{-,K,1} + [PS_1^*] \cdot k_{cat,P,1}) \\
 \frac{d[S_2]}{dt} &= - ([S_2] \cdot [K] \cdot k_{+,K,2}) + ([KS_2] \cdot k_{-,K,2} + [PS_2^*] \cdot k_{cat,P,2})
 \end{aligned}$$

The set of ODEs describing the modified substrates are:

$$\begin{aligned}
 \frac{d[S_1^*]}{dt} &= - ([S_1^*] \cdot [P] \cdot k_{+,P,1}) + ([PS_1^*] \cdot k_{-,P,1} + [KS_1] \cdot k_{cat,K,1}) \\
 \frac{d[S_2^*]}{dt} &= - ([S_2^*] \cdot [P] \cdot k_{+,P,2}) + ([PS_2^*] \cdot k_{-,P,2} + [KS_2] \cdot k_{cat,K,2})
 \end{aligned}$$

The set of ODEs describing the enzyme-substrate complexes are:

$$\begin{aligned}
 \frac{d[KS_1]}{dt} &= - ([KS_1] \cdot (k_{-,K,1} + k_{cat,K,1})) + ([S_1] \cdot [K] \cdot k_{+,K,1}) \\
 \frac{d[KS_2]}{dt} &= - ([KS_2] \cdot (k_{-,K,2} + k_{cat,K,2})) + ([S_2] \cdot [K] \cdot k_{+,K,2}) \\
 \frac{d[PS_1^*]}{dt} &= - ([PS_1^*] \cdot (k_{-,P,1} + k_{cat,P,1})) + ([S_1^*] \cdot [P] \cdot k_{+,P,1}) \\
 \frac{d[PS_2^*]}{dt} &= - ([PS_2^*] \cdot (k_{-,P,2} + k_{cat,P,2})) + ([S_2^*] \cdot [P] \cdot k_{+,P,2})
 \end{aligned}$$

For purposes of display in Fig. 2A of the main text we used the following values for each of the rate constants:

| Parameter     | Value                                       |
|---------------|---------------------------------------------|
| $k_{+,K,i}$   | $0.001 \text{ nM}^{-1} \cdot \text{s}^{-1}$ |
| $k_{-,K,i}$   | $0.001 \text{ s}^{-1}$                      |
| $k_{cat,K,i}$ | $0.999 \text{ s}^{-1}$                      |
| $k_{+,P,i}$   | $0.001 \text{ nM}^{-1} \cdot \text{s}^{-1}$ |
| $k_{-,P,i}$   | $0.001 \text{ s}^{-1}$                      |
| $k_{cat,P,i}$ | $0.999 \text{ s}^{-1}$                      |

Where  $i = 1$  or  $2$ .

Our simulations started with the following initial concentrations:

| Molecular Species | Initial Concentration |
|-------------------|-----------------------|
| $K$               | 0 - 2 nM              |
| $P$               | 1 nM                  |
| $S_1$             | 100 nM                |
| $S_2$             | 0 - 20 $\mu\text{M}$  |

With the remaining molecular species having initial concentrations of 0. The range of initial concentrations of  $K$  and  $S_2$  were used to vary  $r_1$  and  $[S_2]_0/K_m$ , respectively, in Fig. 2A in the main text.

## 1.2 1-Kinase/1-Phosphatase Loop with Many Substrates

The set of enzymatic reactions for the 1K1P loop with many substrates is:

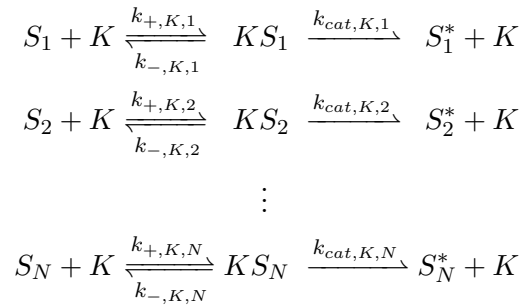

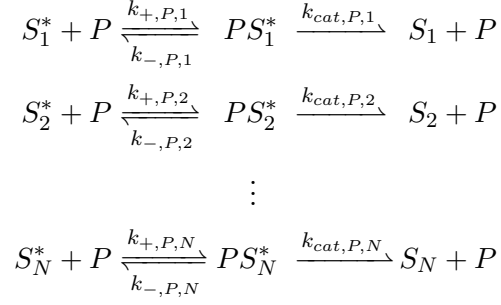

The set of ODEs describing the free enzymes are:

$$\begin{aligned}
\frac{d[K]}{dt} &= - ([S_1] \cdot [K] \cdot k_{+,K,1} + [S_2] \cdot [K] \cdot k_{+,K,2} + \dots + [S_N] \cdot [K] \cdot k_{+,K,N}) \\
&\quad + ([KS_1] \cdot (k_{-,K,1} + k_{cat,K,1}) + [KS_2] \cdot (k_{-,K,2} + k_{cat,K,2}) + \dots + [KS_N] \cdot (k_{-,K,N} + k_{cat,K,N})) \\
\frac{d[P]}{dt} &= - ([S_1^*] \cdot [P] \cdot k_{+,P,1} + [S_2^*] \cdot [P] \cdot k_{+,P,2} + \dots + [S_N^*] \cdot [P] \cdot k_{+,P,N}) \\
&\quad + ([PS_1^*] \cdot (k_{-,P,1} + k_{cat,P,1}) + [PS_2^*] \cdot (k_{-,P,2} + k_{cat,P,2}) + \dots + [PS_N^*] \cdot (k_{-,P,N} + k_{cat,P,N}))
\end{aligned}$$

The set of ODEs describing the unmodified substrates are:

$$\begin{aligned}
\frac{d[S_1]}{dt} &= - ([S_1] \cdot [K] \cdot k_{+,K,1}) + ([KS_1] \cdot k_{-,K,1} + [PS_1^*] \cdot k_{cat,P,1}) \\
\frac{d[S_2]}{dt} &= - ([S_2] \cdot [K] \cdot k_{+,K,2}) + ([KS_2] \cdot k_{-,K,2} + [PS_2^*] \cdot k_{cat,P,2}) \\
&\vdots \\
\frac{d[S_N]}{dt} &= - ([S_N] \cdot [K] \cdot k_{+,K,N}) + ([KS_N] \cdot k_{-,K,N} + [PS_N^*] \cdot k_{cat,P,N})
\end{aligned}$$

The set of ODEs describing the modified substrates are:

$$\begin{aligned}
\frac{d[S_1^*]}{dt} &= - ([S_1^*] \cdot [P] \cdot k_{+,P,1}) + ([PS_1^*] \cdot k_{-,P,1} + [KS_1] \cdot k_{cat,K,1}) \\
\frac{d[S_2^*]}{dt} &= - ([S_2^*] \cdot [P] \cdot k_{+,P,2}) + ([PS_2^*] \cdot k_{-,P,2} + [KS_2] \cdot k_{cat,K,2}) \\
&\vdots \\
\frac{d[S_N^*]}{dt} &= - ([S_N^*] \cdot [P] \cdot k_{+,P,N}) + ([PS_N^*] \cdot k_{-,P,N} + [KS_N] \cdot k_{cat,K,N})
\end{aligned}$$

The set of ODEs describing the enzyme-substrate complexes are:

$$\begin{aligned}
\frac{d[KS_1]}{dt} &= - ([KS_1] \cdot (k_{-,K,1} + k_{cat,K,1})) + ([S_1] \cdot [K] \cdot k_{+,K,1}) \\
\frac{d[KS_2]}{dt} &= - ([KS_2] \cdot (k_{-,K,2} + k_{cat,K,2})) + ([S_2] \cdot [K] \cdot k_{+,K,2}) \\
&\vdots \\
\frac{d[KS_N]}{dt} &= - ([KS_N] \cdot (k_{-,K,N} + k_{cat,K,N})) + ([S_N] \cdot [K] \cdot k_{+,K,N}) \\
\frac{d[PS_1^*]}{dt} &= - ([PS_1^*] \cdot (k_{-,P,1} + k_{cat,P,1})) + ([S_1^*] \cdot [P] \cdot k_{+,P,1}) \\
\frac{d[PS_2^*]}{dt} &= - ([PS_2^*] \cdot (k_{-,P,2} + k_{cat,P,2})) + ([S_2^*] \cdot [P] \cdot k_{+,P,2}) \\
&\vdots \\
\frac{d[PS_N^*]}{dt} &= - ([PS_N^*] \cdot (k_{-,P,N} + k_{cat,P,N})) + ([S_N^*] \cdot [P] \cdot k_{+,P,N})
\end{aligned}$$

The following values for rate constants were used in the simulations presented in Fig. 2B of the main text:

| Parameter     | Value                                       |
|---------------|---------------------------------------------|
| $k_{+,K,i}$   | $0.001 \text{ nM}^{-1} \cdot \text{s}^{-1}$ |
| $k_{-,K,i}$   | $0.001 \text{ s}^{-1}$                      |
| $k_{cat,K,i}$ | $0.999 \text{ s}^{-1}$                      |
| $k_{+,P,i}$   | $0.001 \text{ nM}^{-1} \cdot \text{s}^{-1}$ |
| $k_{-,P,i}$   | $0.001 \text{ s}^{-1}$                      |
| $k_{cat,P,i}$ | $0.999 \text{ s}^{-1}$                      |

The different molecular species were initialized with concentrations:

| Molecular Species | Initial Concentration |
|-------------------|-----------------------|
| $K$               | 0 - 2 nM              |
| $P$               | 1 nM                  |
| $S_i$             | 500 nM                |

$$i = 1, 2, \dots, N$$

The remaining molecular species had initial concentrations of 0. The range of initial concentrations of  $K$  was used to vary the value of  $r_1$ , and  $N$  was varied to obtain the surface in Fig. 2B in the main text.

### 1.3 1–Kinase/2–Phosphatase Loop

The set of enzymatic reactions for the 1K2P loop is:

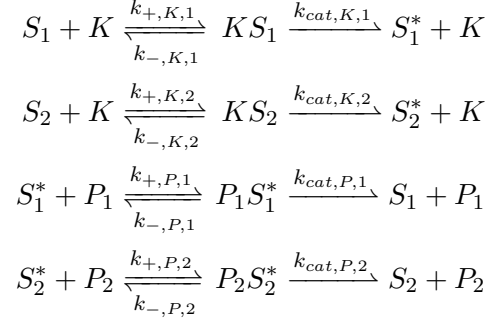

The set of ODEs describing the free enzymes are:

$$\begin{aligned}
 \frac{d[K]}{dt} &= -([S_1] \cdot [K] \cdot k_{+,K,1} + [S_2] \cdot [K] \cdot k_{+,K,2}) + ([KS_1] \cdot (k_{-,K,1} + k_{cat,K,1}) + [KS_2] \cdot (k_{-,K,2} + k_{cat,K,2})) \\
 \frac{d[P_1]}{dt} &= -([S_1^*] \cdot [P_1] \cdot k_{+,P,1}) + ([P_1S_1^*] \cdot (k_{-,P,1} + k_{cat,P,1})) \\
 \frac{d[P_2]}{dt} &= -([S_2^*] \cdot [P_2] \cdot k_{+,P,2}) + ([P_2S_2^*] \cdot (k_{-,P,2} + k_{cat,P,2}))
 \end{aligned}$$

The set of ODEs describing the unmodified substrates are:

$$\begin{aligned}
 \frac{d[S_1]}{dt} &= -([S_1] \cdot [K] \cdot k_{+,K,1}) + ([KS_1] \cdot k_{-,K,1} + [P_1S_1^*] \cdot k_{cat,P,1}) \\
 \frac{d[S_2]}{dt} &= -([S_2] \cdot [K] \cdot k_{+,K,2}) + ([KS_2] \cdot k_{-,K,2} + [P_2S_2^*] \cdot k_{cat,P,2})
 \end{aligned}$$

The set of ODEs describing the modified substrates are:

$$\begin{aligned}
 \frac{d[S_1^*]}{dt} &= -([S_1^*] \cdot [P_1] \cdot k_{+,P,1}) + ([P_1S_1^*] \cdot k_{-,P,1} + [KS_1] \cdot k_{cat,K,1}) \\
 \frac{d[S_2^*]}{dt} &= -([S_2^*] \cdot [P_2] \cdot k_{+,P,2}) + ([P_2S_2^*] \cdot k_{-,P,2} + [KS_2] \cdot k_{cat,K,2})
 \end{aligned}$$

The set of ODEs describing the enzyme-substrate complexes are:

$$\begin{aligned}
 \frac{d[KS_1]}{dt} &= -([KS_1] \cdot (k_{-,K,1} + k_{cat,K,1})) + ([S_1] \cdot [K] \cdot k_{+,K,1}) \\
 \frac{d[KS_2]}{dt} &= -([KS_2] \cdot (k_{-,K,2} + k_{cat,K,2})) + ([S_2] \cdot [K] \cdot k_{+,K,2}) \\
 \frac{d[P_1S_1^*]}{dt} &= -([P_1S_1^*] \cdot (k_{-,P,1} + k_{cat,P,1})) + ([S_1^*] \cdot [P_1] \cdot k_{+,P,1}) \\
 \frac{d[P_2S_2^*]}{dt} &= -([P_2S_2^*] \cdot (k_{-,P,2} + k_{cat,P,2})) + ([S_2^*] \cdot [P_2] \cdot k_{+,P,2})
 \end{aligned}$$

For purposes of display in Figs. 3A and B in the main text, we used the following parameters in the model:

| Parameter     | Value                                       |
|---------------|---------------------------------------------|
| $k_{+,K,i}$   | $0.001 \text{ nM}^{-1} \cdot \text{s}^{-1}$ |
| $k_{-,K,i}$   | $0.001 \text{ s}^{-1}$                      |
| $k_{cat,K,i}$ | $0.999 \text{ s}^{-1}$                      |
| $k_{+,P,i}$   | $0.001 \text{ nM}^{-1} \cdot \text{s}^{-1}$ |
| $k_{-,P,i}$   | $0.001 \text{ s}^{-1}$                      |
| $k_{cat,P,i}$ | $0.999 \text{ s}^{-1}$                      |

$i = 1 \text{ or } 2$

Each of the molecular species in the model started with the following initial concentrations:

| Molecular Species | Initial Concentration |
|-------------------|-----------------------|
| $K$               | 1 nM                  |
| $P_1$             | 0.5-100 nM            |
| $P_2$             | 0.5-100 nM            |
| $S_1$             | 100 nM                |
| $S_2$             | 0, 20 $\mu\text{M}$   |

The remaining molecular species had initial concentrations of 0. The range of initial concentrations for  $P_1$  and  $P_2$  were used to independently set  $r_1$  and  $r_2$ , respectively, in Figs. 3A and B in the main text. In Fig. 3A  $[S_2]_0 = 0$  and in Fig 3B  $[S_2]_0 = 20 \text{ nM}$ .

#### 1.4 2-Kinase/1-Phosphatase Loop

The set of enzymatic reactions for the 2K1P loop is:

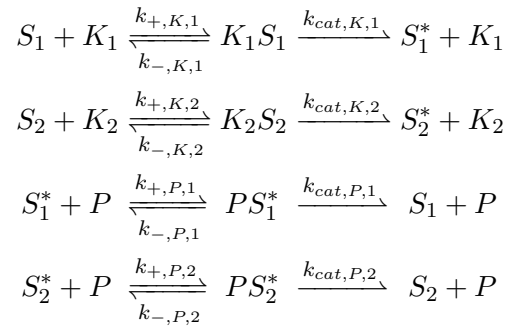



The set of ODEs describing the free enzymes are:

$$\begin{aligned}\frac{d[K_1]}{dt} &= - ([S_1] \cdot [K_1] \cdot k_{+,K,1}) + ([K_1S_1] \cdot (k_{-,K,1} + k_{cat,K,1})) \\ \frac{d[K_2]}{dt} &= - ([S_2] \cdot [K_2] \cdot k_{+,K,2}) + ([K_2S_2] \cdot (k_{-,K,2} + k_{cat,K,2})) \\ \frac{d[P]}{dt} &= - ([S_1^*] \cdot [P] \cdot k_{+,P,1} + [S_2^*] \cdot [P] \cdot k_{+,P,2}) + ([PS_1^*] \cdot (k_{-,P,1} + k_{cat,P,1}) + [PS_2^*] \cdot (k_{-,P,2} + k_{cat,P,2}))\end{aligned}$$

The set of ODEs describing the unmodified substrates are:

$$\begin{aligned}\frac{d[S_1]}{dt} &= - ([S_1] \cdot [K_1] \cdot k_{+,K,1}) + ([K_1S_1] \cdot k_{-,K,1} + [PS_1^*] \cdot k_{cat,P,1}) \\ \frac{d[S_2]}{dt} &= - ([S_2] \cdot [K_2] \cdot k_{+,K,2}) + ([K_2S_2] \cdot k_{-,K,2} + [PS_2^*] \cdot k_{cat,P,2})\end{aligned}$$

The set of ODEs describing the modified substrates are:

$$\begin{aligned}\frac{d[S_1^*]}{dt} &= - ([S_1^*] \cdot [P] \cdot k_{+,P,1}) + ([PS_1^*] \cdot k_{-,P,1} + [K_1S_1] \cdot k_{cat,K,1}) \\ \frac{d[S_2^*]}{dt} &= - ([S_2^*] \cdot [P] \cdot k_{+,P,2}) + ([PS_2^*] \cdot k_{-,P,2} + [K_2S_2] \cdot k_{cat,K,2})\end{aligned}$$

The set of ODEs describing the enzyme-substrate complexes are:

$$\begin{aligned}\frac{d[K_1S_1]}{dt} &= - ([K_1S_1] \cdot (k_{-,K,1} + k_{cat,K,1})) + ([S_1] \cdot [K_1] \cdot k_{+,K,1}) \\ \frac{d[K_2S_2]}{dt} &= - ([K_2S_2] \cdot (k_{-,K,2} + k_{cat,K,2})) + ([S_2] \cdot [K_2] \cdot k_{+,K,2}) \\ \frac{d[PS_1^*]}{dt} &= - ([PS_1^*] \cdot (k_{-,P,1} + k_{cat,P,1})) + ([S_1^*] \cdot [P] \cdot k_{+,P,1}) \\ \frac{d[PS_2^*]}{dt} &= - ([PS_2^*] \cdot (k_{-,P,2} + k_{cat,P,2})) + ([S_2^*] \cdot [P] \cdot k_{+,P,2})\end{aligned}$$

For purposes of display in Figs. 3A and C in the main text we used the following parameters:

| Parameter     | Value                                       |
|---------------|---------------------------------------------|
| $k_{+,K,i}$   | $0.001 \text{ nM}^{-1} \cdot \text{s}^{-1}$ |
| $k_{-,K,i}$   | $0.001 \text{ s}^{-1}$                      |
| $k_{cat,K,i}$ | $0.999 \text{ s}^{-1}$                      |
| $k_{+,P,i}$   | $0.001 \text{ nM}^{-1} \cdot \text{s}^{-1}$ |
| $k_{-,P,i}$   | $0.001 \text{ s}^{-1}$                      |
| $k_{cat,P,i}$ | $0.999 \text{ s}^{-1}$                      |

$i = 1 \text{ or } 2$

Each molecular species were initialized at the following concentrations:

| Molecular Species | Initial Concentration |
|-------------------|-----------------------|
| $K_1$             | 0 - 2 nM              |
| $K_2$             | 0 - 2 nM              |
| $P$               | 1 nM                  |
| $S_1$             | 100 nM                |
| $S_2$             | 0, 20 $\mu$ M         |

The remaining molecular species had initial concentrations of 0. The range of initial concentrations of  $K_1$  and  $K_2$  were used to set the values of  $r_1$  and  $r_2$ , respectively, in Figs. 3A and C in the main text. In Fig. 3A,  $[S_2]_0 = 0$  and in Fig. 3C,  $[S_2]_0 = 20nM$ .

### 1.5 Cascade with Multiple Phosphatases

The set of kinase enzymatic reactions for the cascade with multiple phosphatases is:

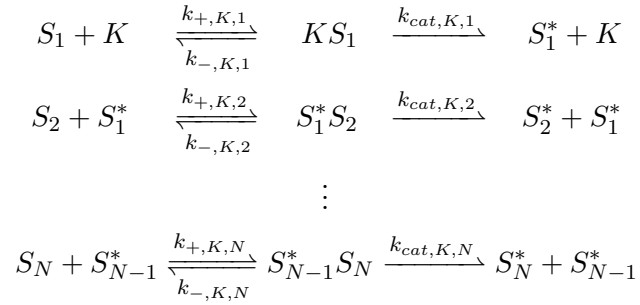

Note that  $K$  is the input kinase and  $S_i^*$  serves as the kinase for  $S_{i+1}$ . The set of phosphatase enzymatic reactions is:

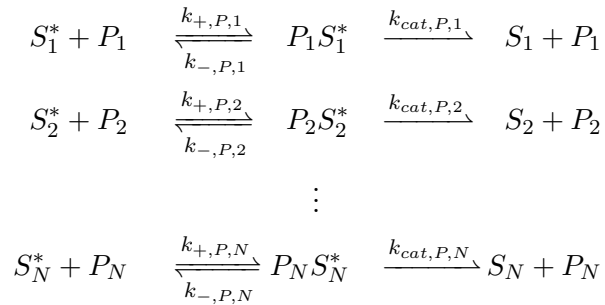

The set of ODEs describing the free enzymes are:

$$\begin{aligned}
\frac{d[K]}{dt} &= - ([S_1] \cdot [K] \cdot k_{+,K,1}) + ([KS_1] \cdot (k_{-,K,1} + k_{cat,K,1})) \\
\frac{d[P_1]}{dt} &= - ([S_1^*] \cdot [P_1] \cdot k_{+,P,1}) + ([P_1S_1^*] \cdot (k_{-,P,1} + k_{cat,P,1})) \\
\frac{d[P_i]}{dt} &= - ([S_i^*] \cdot [P_i] \cdot k_{+,P,i}) + ([P_iS_i^*] \cdot (k_{-,P,i} + k_{cat,P,i})) \\
\frac{d[P_N]}{dt} &= - ([S_N^*] \cdot [P_N] \cdot k_{+,P,N}) + ([P_NS_N^*] \cdot (k_{-,P,N} + k_{cat,P,N}))
\end{aligned}$$

The set of ODEs describing the unmodified substrates are:

$$\begin{aligned}
\frac{d[S_1]}{dt} &= - ([S_1] \cdot [K] \cdot k_{+,K,1}) + ([KS_1] \cdot k_{-,K,1} + [P_1S_1^*] \cdot k_{cat,P,1}) \\
\frac{d[S_i]}{dt} &= - ([S_i] \cdot [S_{i-1}^*] \cdot k_{+,K,i}) + ([S_{i-1}^*S_i] \cdot k_{-,K,i} + [P_iS_i^*] \cdot k_{cat,P,i}) \\
\frac{d[S_N]}{dt} &= - ([S_N] \cdot [S_{N-1}^*] \cdot k_{+,K,N}) + ([S_{N-1}^*S_N] \cdot k_{-,K,N} + [P_NS_N^*] \cdot k_{cat,P,N})
\end{aligned}$$

The set of ODEs describing the modified substrates are:

$$\begin{aligned}
\frac{d[S_1^*]}{dt} &= - ([S_1^*] \cdot [P] \cdot k_{+,K,1}) + [S_2] \cdot [S_1^*] \cdot k_{+,K,2} \\
&\quad + ([P_1S_1^*] \cdot k_{-,P,1} + [KS_1] \cdot k_{cat,K,1} + [S_1^*S_2] \cdot (k_{-,K,2} + k_{cat,K,2})) \\
\frac{d[S_i^*]}{dt} &= - ([S_i^*] \cdot [P_i] \cdot k_{+,K,i}) + [S_{i+1}] \cdot [S_i^*] \cdot k_{+,K,i+1} \\
&\quad + ([P_iS_i^*] \cdot k_{-,P,i} + [S_{i-1}^*S_i] \cdot k_{cat,K,i} + [S_i^*S_{i+1}] \cdot (k_{-,K,i+1} + k_{cat,K,i+1})) \\
\frac{d[S_N^*]}{dt} &= - ([S_N^*] \cdot [P_N] \cdot k_{+,K,N}) + ([P_NS_N^*] \cdot k_{-,P,N} + [S_{N-1}^*S_N] \cdot k_{cat,K,N})
\end{aligned}$$

The set of ODEs describing the enzyme-substrate complexes are:

$$\begin{aligned}
\frac{d[KS_1]}{dt} &= - ([KS_1] \cdot (k_{-,K,1} + k_{cat,K,1})) + ([S_1] \cdot [K] \cdot k_{+,K,1}) \\
\frac{d[S_{i-1}^*S_i]}{dt} &= - ([S_{i-1}^*S_i] \cdot (k_{-,K,i} + k_{cat,K,i})) + ([S_i] \cdot [S_{i-1}^*] \cdot k_{+,K,i}) \\
\frac{d[S_{N-1}^*S_N]}{dt} &= - ([S_{N-1}^*S_N] \cdot (k_{-,K,N} + k_{cat,K,N})) + ([S_N] \cdot [S_{N-1}^*] \cdot k_{+,K,N}) \\
\frac{d[P_1S_1^*]}{dt} &= - ([P_1S_1^*] \cdot (k_{-,P,1} + k_{cat,P,1})) + ([S_1^*] \cdot [P_1] \cdot k_{+,P,1}) \\
\frac{d[P_iS_i^*]}{dt} &= - ([P_iS_i^*] \cdot (k_{-,P,i} + k_{cat,P,i})) + ([S_i^*] \cdot [P_i] \cdot k_{+,P,i}) \\
\frac{d[P_NS_N^*]}{dt} &= - ([P_NS_N^*] \cdot (k_{-,P,N} + k_{cat,P,N})) + ([S_N^*] \cdot [P_N] \cdot k_{+,P,N})
\end{aligned}$$

Where  $i = 2, \dots, N - 1$ .

For purposes of display in Fig. 3D in the main text, we used the following parameters:

| Parameter     | Value                                       |
|---------------|---------------------------------------------|
| $k_{+,K,i}$   | $0.001 \text{ nM}^{-1} \cdot \text{s}^{-1}$ |
| $k_{-,K,i}$   | $10^{i-8} \text{ s}^{-1}$                   |
| $k_{cat,K,i}$ | $0.999 \cdot 10^{i-5} \text{ s}^{-1}$       |
| $k_{+,P,i}$   | $0.001 \text{ nM}^{-1} \cdot \text{s}^{-1}$ |
| $k_{-,P,i}$   | $10^{i-8} \text{ s}^{-1}$                   |
| $k_{cat,P,i}$ | $0.999 \cdot 10^{i-5} \text{ s}^{-1}$       |

$$i = 1, 2, \dots, N$$

The  $k_{cat}$ 's and  $k_-$ 's were calculated as  $0.999 \cdot 10^{i-5} \text{ s}^{-1}$  and  $10^{i-8} \text{ s}^{-1}$ , respectively; the kinetic parameters of reaction  $i$  in the cascade were thus varied so that each substrate concentration was  $10 \cdot K_m$  in respect to its kinase and phosphatase.

The molecular species in the system started with the following initial concentrations:

| Molecular Species | Initial Concentration       |
|-------------------|-----------------------------|
| $K$               | $10^{-18} - 0.1 \text{ nM}$ |
| $P_i$             | $0.01 \text{ nM}$           |
| $S_1$             | $1 \text{ nM}$              |
| $S_2$             | $10 \text{ nM}$             |
| $\vdots$          | $\vdots$                    |
| $S_i$             | $10 \cdot S_{i-1}$          |
| $\vdots$          | $\vdots$                    |
| $S_N$             | $10 \cdot S_{N-1}$          |

$$i = 1, 2, \dots, N$$

The remaining molecular species had initial concentrations of 0. We systematically increased the initial concentration of the  $S_i$ 's ( $[S_i]_0 = 10 \cdot [S_{i-1}]_0$ ); since  $S_{i-1}^*$  is the kinase for  $S_i$ , this ensured that all substrates were at higher concentrations than their enzymes. The range of initial concentrations of  $K$  were used to vary the value of  $r$  in Fig. 3D.

## 1.6 Cascade with a Single Phosphatase

The set of kinase enzymatic reactions for the cascade with a single phosphatase is:

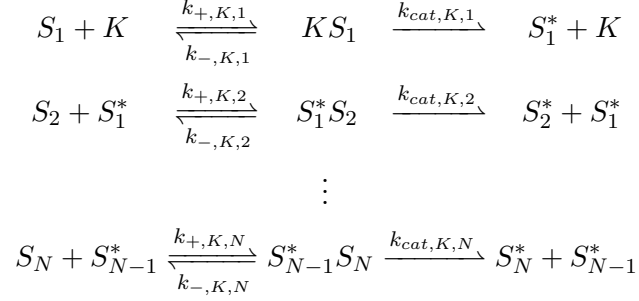

The set of phosphatase enzymatic reactions is:

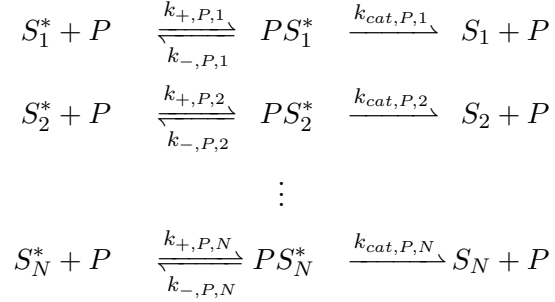

The set of ODEs describing free enzymes are:

$$\begin{aligned}
 \frac{d[K]}{dt} &= - ([S_1] \cdot [K] \cdot k_{+,K,1}) + ([KS_1] \cdot (k_{-,K,1} + k_{cat,K,1})) \\
 \frac{d[P]}{dt} &= - ([S_1^*] \cdot [P] \cdot k_{+,P,1} + [S_2^*] \cdot k_{+,P,2} + \dots + [S_N^*] \cdot k_{+,P,N}) \\
 &\quad + ([PS_1^*] \cdot (k_{-,P,1} + k_{cat,P,1}) + [PS_2^*] \cdot (k_{-,P,2} + k_{cat,P,2}) + \dots + [PS_N^*] \cdot (k_{-,P,N} + k_{cat,P,N}))
 \end{aligned}$$

The set of ODEs describing unmodified substrates are:

$$\begin{aligned}
 \frac{d[S_1]}{dt} &= - ([S_1] \cdot [K] \cdot k_{+,K,1}) + ([KS_1] \cdot k_{-,K,1} + [PS_1^*] \cdot k_{cat,P,1}) \\
 \frac{d[S_i]}{dt} &= - ([S_i] \cdot [S_{i-1}^*] \cdot k_{+,K,i}) + ([S_{i-1}^* S_i] \cdot k_{-,K,i} + [PS_i^*] \cdot k_{cat,P,i}) \\
 \frac{d[S_N]}{dt} &= - ([S_N] \cdot [S_{N-1}^*] \cdot k_{+,K,N}) + ([S_{N-1}^* S_N] \cdot k_{-,K,N} + [PS_N^*] \cdot k_{cat,P,N})
 \end{aligned}$$

The set of ODEs describing modified substrates are:

$$\begin{aligned}
\frac{d[S_1^*]}{dt} &= - ([S_1^*] \cdot [P] \cdot k_{+,K,1}) + [S_2] \cdot [S_1^*] * k_{+,K,2}) \\
&\quad + ([PS_1^*] \cdot k_{-,P,1} + [KS_1] \cdot k_{cat,K,1} + [S_1^*S_2] \cdot (k_{-,K,2} + k_{cat,K,2})) \\
\frac{d[S_i^*]}{dt} &= - ([S_i^*] \cdot [P] \cdot k_{+,K,i}) + [S_{i+1}] \cdot [S_i^*] * k_{+,K,i+1}) \\
&\quad + ([PS_i^*] \cdot k_{-,P,i} + [S_{i-1}^*S_i] \cdot k_{cat,K,i} + [S_i^*S_{i+1}] \cdot (k_{-,K,i+1} + k_{cat,K,i+1})) \\
\frac{d[S_N^*]}{dt} &= - ([S_N^*] \cdot [P] \cdot k_{+,K,N}) + ([PS_N^*] \cdot k_{-,P,N} + [S_{N-1}^*S_N] \cdot k_{cat,K,N})
\end{aligned}$$

The set of ODEs describing enzyme-substrate complexes are:

$$\begin{aligned}
\frac{d[KS_1]}{dt} &= - ([KS_1] \cdot (k_{-,K,1} + k_{cat,K,1})) + ([S_1] \cdot [K] \cdot k_{+,K,1}) \\
\frac{d[PS_1^*]}{dt} &= - ([PS_1^*] \cdot (k_{-,P,1} + k_{cat,P,1})) + ([S_1^*] \cdot [P] \cdot k_{+,P,1}) \\
\frac{d[S_{i-1}^*S_i]}{dt} &= - ([S_{i-1}^*S_i] \cdot (k_{-,K,i} + k_{cat,K,i})) + ([S_i] \cdot [S_{i-1}^*] \cdot k_{+,K,i}) \\
\frac{d[PS_i^*]}{dt} &= - ([PS_i^*] \cdot (k_{-,P,i} + k_{cat,P,i})) + ([S_i^*] \cdot [P] \cdot k_{+,P,i}) \\
\frac{d[S_{N-1}^*S_N]}{dt} &= - ([S_{N-1}^*S_N] \cdot (k_{-,K,N} + k_{cat,K,N})) + ([S_N] \cdot [S_{N-1}^*] \cdot k_{+,K,N}) \\
\frac{d[PS_N^*]}{dt} &= - ([PS_N^*] \cdot (k_{-,P,N} + k_{cat,P,N})) + ([S_N^*] \cdot [P] \cdot k_{+,P,N})
\end{aligned}$$

Where  $i = 2, \dots, N - 1$ .

For purposes of display in Fig. 3D, we used the following parameters:

| Parameter     | Value                                       |
|---------------|---------------------------------------------|
| $k_{+,K,i}$   | $0.001 \text{ nM}^{-1} \cdot \text{s}^{-1}$ |
| $k_{-,K,i}$   | $(10^{i-8}) \text{ s}^{-1}$                 |
| $k_{cat,K,i}$ | $(0.999 \cdot 10^{i-5}) \text{ s}^{-1}$     |
| $k_{+,P,i}$   | $0.001 \text{ nM}^{-1} \cdot \text{s}^{-1}$ |
| $k_{-,P,i}$   | $(10^{i-8}) \text{ s}^{-1}$                 |
| $k_{cat,P,i}$ | $(0.999 \cdot 10^{i-5}) \text{ s}^{-1}$     |

The  $k_{cat}$ 's and  $k_-$ 's were calculated as in section 1.5.

The molecular species were initialized at the following concentrations:

| Molecular Species | Initial Concentration |
|-------------------|-----------------------|
| $K$               | $10^{-18}$ - 0.1 nM   |
| $P$               | 0.01 nM               |
| $S_1$             | 1 nM                  |
| $S_2$             | 10 nM                 |
| $\vdots$          | $\vdots$              |
| $S_i$             | $10 \cdot S_{i-1}$    |
| $\vdots$          | $\vdots$              |
| $S_N$             | $10 \cdot S_{N-1}$    |

$$i = 1, 2, \dots, N$$

Remaining molecular species were set with initial concentrations of 0. Increasing the initial concentrations of  $S_i$  ensured that  $[S_i]_0 = 10 \cdot [S_{i-1}]_0$  since  $S_{i-1}^*$  is the kinase for  $S_i$  to ensure that the concentration of substrates were larger than the concentrations of their respective kinases. The range of initial concentrations of  $K$  were used to vary the value of  $r$  in Fig. 3D.

## 2 Analytical Results for the 1–Kinase/1–Phosphatase Loop

### 2.1 Mutual inhibition for competitive substrates

Here we will show that the 1K1P loop displays behavior dependent on  $r$  without regard for other parameters. The enzymatic reactions for an enzyme with two substrates can be written as:

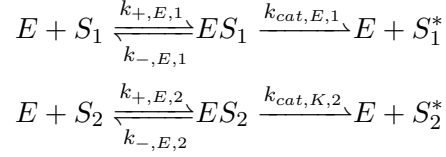

with  $E = K$  or  $P$ . The Michaelis-Menten constant and maximum velocity of the enzyme for either substrate are defined as:

$$\begin{aligned} K_{m,E,x} &\equiv \frac{k_{-,E,x} + k_{cat,E,x}}{k_{+,E,x}} \\ V_{max,E,x} &\equiv k_{cat,E,x}[E]_0 \end{aligned}$$

We can obtain the following kinetic equations:

$$\frac{d[ES_1]}{dt} = [E][S_1]k_{+,E,1} - [ES_1](k_{-,E,1} + k_{cat,E,1}) \quad (2.1.1)$$

$$\frac{d[ES_2]}{dt} = [E][S_2]k_{+,E,2} - [ES_2](k_{-,E,2} + k_{cat,E,2}) \quad (2.1.2)$$

$$\frac{d[S_1^*]}{dt} = k_{cat,E,1}[ES_1] \quad (2.1.3)$$

We also have the conservation of mass:

$$[E]_0 = [E] + [ES_1] + [ES_2] \quad (2.1.4)$$

Assuming pseudo-steady state for the enzymatic reactions, from equations 2.1.1 and 2.1.2 we get:

$$[ES_1] = \frac{[E][S_1]}{K_{m,E,1}}$$

$$[ES_2] = \frac{[E][S_2]}{K_{m,E,2}}$$

both of which can be substituted into equation 2.1.4:

$$\begin{aligned} [E]_0 &= [E] \left( 1 + \frac{[S_1]}{K_{m,E,1}} + \frac{[S_2]}{K_{m,E,2}} \right) \\ [E] &= \frac{[E]_0}{1 + \frac{[S_1]}{K_{m,E,1}} + \frac{[S_2]}{K_{m,E,2}}} \end{aligned}$$



$$[ES_1] = \frac{[E]_0[S_1]}{[S_1] + K_{m,E,1} \left(1 + \frac{[S_2]}{K_{m,E,2}}\right)}$$

This can be substituted into 2.1.3 to arrive at:

$$\begin{aligned} \frac{d[S_1^*]}{dt} &= \frac{V_{max,E,1}[S_1]}{\alpha_{E,1}K_{m,E,1} + [S_1]} \\ \alpha_{E,1} &\equiv 1 + \frac{[S_2]}{K_{m,E,2}} \end{aligned} \quad (2.1.5)$$

where  $\alpha_{E,1}$  is the inhibitory constant for  $S_2$  competition with  $S_1$  for  $E$ .

## 2.2 Steady-state solution for $[S_1^*]$

As Goldbeter and Koshland originally noted, for a futile cycle at steady state we will have  $d[S_1^*]/dt = d[S_1]/dt$  [1]. Given 2.1.5, for the 1K1P loop with two substrates this yields:

$$\frac{V_{max,K,1}[S_1]}{\alpha_{K,1}K_{m,K,1} + [S_1]} = \frac{V_{max,P,1}[S_1^*]}{\alpha_{P,1}K_{m,P,1} + [S_1^*]} \quad (2.2.1)$$

Following the standard Michaelis-Menten assumptions [1, 2], we have that  $[S_i]_0 \gg [K]_0, [P]_0$ . This gives us  $[S_1]_0 = [S_1] + [S_1^*]$ , which can be substituted into 2.2.1:

$$\frac{V_{max,K,1}([S_1]_0 - [S_1^*])}{\alpha_{K,1}K_{m,K,1} + ([S_1]_0 - [S_1^*])} = \frac{V_{max,P,1}[S_1^*]}{\alpha_{P,1}K_{m,P,1} + [S_1^*]}$$

Dividing both sides by  $[S_1]_0$ , we get:

$$\frac{V_{max,K,1}(1 - S_1^*)}{\alpha_{K,1}K_{K,1} + (1 - S_1^*)} = \frac{V_{max,P,1}S_1^*}{\alpha_{P,1}K_{P,1} + S_1^*} \quad (2.2.2)$$

$$\begin{aligned} K_{K,1} &\equiv \frac{K_{m,K,1}}{[S_1]_0}, \quad K_{P,1} \equiv \frac{K_{m,P,1}}{[S_1]_0} \\ S_1 &\equiv \frac{[S_1]}{[S_1]_0}, \quad S_1^* \equiv \frac{[S_1^*]}{[S_1]_0} \end{aligned}$$

We can expand 2.2.2:

$$\begin{aligned} \alpha_{P,1}V_{max,K,1}K_{P,1} - \alpha_{P,1}V_{max,K,1}K_{P,1}S_1^* + V_{max,K,1}S_1^* - V_{max,K,1}(S_1^*)^2 \\ = \alpha_{K,1}V_{max,P,1}K_{K,1}S_1^* + V_{max,P,1}S_1^* - V_{max,P,1}(S_1^*)^2 \end{aligned}$$

Dividing both sides by  $V_{max,P,1}$ , we get:

$$r_1\alpha_{P,1}K_{P,1} - r_1\alpha_{P,1}K_{P,1}S_1^* + r_1S_1^* - r_1(S_1^*)^2 = \alpha_{K,1}K_{K,1}S_1^* + S_1^* - (S_1^*)^2$$

$$r_1 \equiv \frac{V_{max,K,1}}{V_{max,P,1}}$$

which can be simplified to:

$$(1 - r_1)(S_1^*)^2 + ((r_1 - 1) - (\alpha_{K,1}K_{K,1} + r_1\alpha_{P,1}K_{P,1}))S_1^* + r_1\alpha_{P,1}K_{P,1} = 0 \quad (2.2.3)$$

Solving for  $S_1^*$ :

$$S_1^* = \frac{(r_1 - 1) - (\alpha_{K,1}K_{K,1} + r_1\alpha_{P,1}K_{P,1}) + \sqrt{((r_1 - 1) - (\alpha_{K,1}K_{K,1} + r_1\alpha_{P,1}K_{P,1}))^2 + 4(r_1 - 1)r_1\alpha_{P,1}K_{P,1}}}{2(r_1 - 1)} \quad (2.2.4)$$

There are two important things to note about this solution. For one, the above equation is valid for  $r_1 > 0$ ; at  $r_1 = 0$  one needs to take the other branch of the solution (i.e. the branch in which the square root term is subtracted in the numerator). Also, at  $r_1 = 1$ , 2.2.4 has a nonessential singularity. To obtain the behavior at  $r_1 = 1$ , we see 2.2.3 becomes:

$$-(\alpha_{K,1}K_{K,1} + \alpha_{P,1}K_{P,1})S_1^* + \alpha_{P,1}K_{P,1} = 0 \quad (2.2.5)$$

giving us  $S_1^*$  for  $r_1 = 1$ :

$$S_1^* = \frac{\alpha_{P,1}K_{P,1}}{\alpha_{K,1}K_{K,1} + \alpha_{P,1}K_{P,1}} \quad (2.2.6)$$

### 2.3 $dS_1^*/dS_2^*$ is always positive

We wish to show that  $\frac{dS_1^*}{dS_2^*} > 0$  regardless of the values of any parameter. This would indicate that the ultrasensitivity of  $S_2$  transfers to  $S_1$  (i.e., since  $S_2^*$  will decrease as  $[S_2]_0$  increases for  $r_2 < 1$ ,  $S_1^*$  would also decrease). To do so we notice that, by the chain rule:

$$\frac{dS_1^*}{dS_2^*} = \frac{\partial S_1^*}{\partial \alpha_{K,1}} \cdot \frac{d\alpha_{K,1}}{dS_2^*} + \frac{\partial S_1^*}{\partial \alpha_{P,1}} \cdot \frac{d\alpha_{P,1}}{dS_2^*} \quad (2.3.1)$$

This is because  $S_1^*$  is a function of  $\alpha_{K,1}$ ,  $\alpha_{P,1}$ ,  $r_1$ , and a vector of positive constants 2.2.4. Each of the  $\alpha$  terms are, in turn, functions of  $S_2^*$ .

We will explore the signs of each component of 2.3.1 to show that  $\frac{dS_1^*}{dS_2^*} > 0$ . Using

Mathematica [3], we can obtain the partial derivative of 2.2.4 with respect to  $\alpha_{K,1}$  at  $r_1 \neq 1$ :

$$\frac{\partial S_1^*}{\partial \alpha_{K,1}} = \frac{-K_{K,1} + \frac{K_{K,1}x}{\sqrt{x^2+y}}}{2(r_1 - 1)} \quad (2.3.2)$$

Where:

$$x \equiv -((r_1 - 1) - (\alpha_{K,1}K_{K,1} + r_1\alpha_{P,1}K_{P,1})), \quad y \equiv 4(r_1 - 1)r_1\alpha_{P,1}K_{P,1} \quad (2.3.3)$$

Factoring out  $\frac{-K_{K,1}}{\sqrt{x^2+y}}$  we obtain:

$$\frac{\partial S_1^*}{\partial \alpha_{K,1}} = \frac{-K_{K,1}}{\sqrt{x^2+y}} \cdot \frac{-x + \sqrt{x^2+y}}{2(r_1 - 1)} \quad (2.3.4)$$

Notice that the second term in 2.3.4 is the expression for  $S_1^*$ , simplifying  $\frac{dS_1^*}{d\alpha_{K,1}}$  to:

$$\frac{\partial S_1^*}{\partial \alpha_{K,1}} = \frac{-K_{K,1}}{\sqrt{x^2+y}} S_1^* \quad (2.3.5)$$

Note that  $K_{K,1}$ ,  $S_1^*$  and  $\sqrt{x^2+y}$  are all positive, making  $\frac{\partial S_1^*}{\partial \alpha_{K,1}} < 0$  for  $r_1 \neq 1$ . We can also demonstrate this for  $r_1 = 1$  by taking the partial derivative of 2.2.6 with respect to  $\alpha_{K,1}$ :

$$\frac{\partial S_1^*}{\partial \alpha_{K,1}} = \frac{-\alpha_{P,1}K_{K,1}K_{P,1}}{(\alpha_{K,1}K_{K,1} + \alpha_{P,1}K_{P,1})^2} \quad (2.3.6)$$

Which is clearly negative, demonstrating that  $\frac{\partial S_1^*}{\partial \alpha_{K,1}} < 0$  for any set of parameters.

Next it can be shown that  $\frac{\partial S_1^*}{\partial \alpha_{P,1}} > 0$ . We can obtain an expression the partial derivative of 2.2.4 with respect to  $\alpha_{P,1}$  at  $r_1 \neq 1$  with Mathematica [3] :

$$\frac{\partial S_1^*}{\partial \alpha_{P,1}} = \frac{-r_1K_{P,1} + \frac{2(r_1-1)r_1K_{P,1} + r_1K_{P,1}x}{\sqrt{x^2+y}}}{2(r_1 - 1)} \quad (2.3.7)$$

By factoring out  $\frac{r_1K_{P,1}}{\sqrt{x^2+y}}$  we get:

$$\frac{\partial S_1^*}{\partial \alpha_{P,1}} = \frac{r_1K_{P,1}}{\sqrt{x^2+y}} \left( \frac{2(r_1 - 1) + x - \sqrt{x^2+y}}{2(r_1 - 1)} \right) \quad (2.3.8)$$

Notice that the second term in 2.3.8 is the expression for  $1 - S_1^*$ , simplifying  $\frac{\partial S_1^*}{\partial \alpha_{P,1}}$  to:

$$\frac{\partial S_1^*}{\partial \alpha_{P,1}} = \frac{r_1K_{P,1}}{\sqrt{x^2+y}} (1 - S_1^*) \quad (2.3.9)$$

We can easily see that 2.3.9 is positive, confirming  $\frac{\partial S_1^*}{\partial \alpha_{P,1}} > 0$  for  $r_1 \neq 1$ . We can also demonstrate this for  $r_1 = 1$  by taking the partial derivative of 2.2.6 with respect to  $\alpha_{P,1}$ :

$$\frac{\partial S_1^*}{\partial \alpha_{P,1}} = \frac{\alpha_{K,1} K_{K,1} K_{P,1}}{(\alpha_{K,1} K_{K,1} + \alpha_{P,1} K_{P,1})^2} \quad (2.3.10)$$

Which is clearly positive, demonstrating that  $\frac{\partial S_1^*}{\partial \alpha_{P,1}} > 0$  for any set of parameters.

It is easy to show that  $\frac{d\alpha_{K,1}}{dS_2^*} < 0$ :

$$\begin{aligned} \alpha_{K,1} &= 1 + \frac{[S_2]}{K_{m,K,2}} \\ &= 1 + \frac{[S_2]_0 - [S_2^*]}{K_{m,K,2}} \\ &= 1 + \frac{1 - S_2^*}{K_{K,2}} \\ \frac{d\alpha_{K,1}}{dS_2^*} &= -\frac{1}{K_{K,2}} < 0 \end{aligned}$$

Similarly, we can show  $\frac{d\alpha_{P,1}}{dS_2^*} > 0$ :

$$\begin{aligned} \alpha_{P,1} &= 1 + \frac{[S_2^*]}{K_{m,P,2}} \\ &= 1 + \frac{S_2^*}{K_{P,2}} \\ \frac{d\alpha_{P,1}}{dS_2^*} &= \frac{1}{K_{P,2}} > 0 \end{aligned}$$

Now we have determined the behaviors of each component of the two implementations of the chain rules presented in 2.3.1 for all values of  $r_1$  and  $r_2$ . When we refer back to the chain rule (2.3.1) we notice that both terms are positive:

$$\begin{aligned} \frac{dS_1^*}{dS_2^*} &= \frac{\partial S_1^*}{\partial \alpha_{K,1}} \cdot \frac{d\alpha_{K,1}}{dS_2^*} + \frac{\partial S_1^*}{\partial \alpha_{P,1}} \cdot \frac{d\alpha_{P,1}}{dS_2^*} \\ \frac{dS_1^*}{dS_2^*} &= (-)(-) + (+)(+) \end{aligned}$$

This means that changes in  $S_1^*$  upon increases in  $S_2^*$  will always be positive. The increase in ultrasensitivity of  $S_2^*$  is thus transferred to  $S_1^*$  regardless of the values of the other parameters.

### 3 Analytical Results for the 1–Kinase/1–Phosphatase Loop with Many Substrates

The 1K1P loop can be expanded to include many substrates of the kinase and phosphatase. In this case we would have a system of enzymes such that:

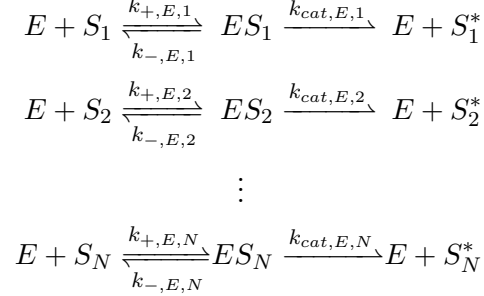

where  $E = K$  or  $P$ . From these equations we have:

$$[ES_1] = \frac{[E][S_1]}{K_{m,E,1}}, [ES_2] = \frac{[E][S_2]}{K_{m,E,2}}, \dots, [ES_N] = \frac{[E][S_N]}{K_{m,E,N}} \quad (3.1)$$

We also know from the conservation of mass of the enzyme:

$$[E]_0 = [E] + [ES_1] + [ES_2] + \dots + [ES_N] \quad (3.2)$$

Substituting the system of equations from 3.1 into 3.2, we get:

$$\begin{aligned}
 [E]_0 &= [E] \left( 1 + \frac{[S_1]}{K_{m,E,1}} + \frac{[S_2]}{K_{m,E,2}} + \dots + \frac{[S_N]}{K_{m,E,N}} \right) \\
 [E] &= \frac{[E]_0}{1 + \frac{[S_1]}{K_{m,E,1}} + \frac{[S_2]}{K_{m,E,2}} + \dots + \frac{[S_N]}{K_{m,E,N}}} \\
 [ES_1] &= \frac{[E]_0[S_1]}{[S_1] + K_{m,E,1} \left( 1 + \frac{[S_2]}{K_{m,E,2}} + \dots + \frac{[S_N]}{K_{m,E,N}} \right)} \quad (3.3)
 \end{aligned}$$

Substituting 3.3 into the previously defined 2.1.3, we arrive at:

$$\begin{aligned}
 \frac{d[S_1^*]}{dt} &= \frac{V_{max,1}[S_1]}{\alpha K_{m,E,1} + [S_1]} \\
 \alpha &\equiv 1 + \sum_{i=2}^N \frac{[S_i]}{K_{m,E,i}}
 \end{aligned}$$

From the above equation, we can proceed to solve for  $S_1^*$  as in section 2.2; as expected, one obtains equation 2.2.4, but with  $\alpha_{K,1} \equiv 1 + \sum_{i=2}^N [S_i]/K_{m,K,i}$  and  $\alpha_{P,1} \equiv 1 + \sum_{i=2}^N [S_i^*]/K_{m,P,i}$ .

The increase in ultrasensitivity observed in Fig. 2B of the main text arises from the fact that, for the parameters we considered, at any  $r_1 < 1$ , the phosphatase has a higher maximum velocity

than the kinase. As such, the majority of any substrates present will exist in the unphosphorylated form (i.e.  $S_i^* < 0.5 \forall i$ ). As more substrates are added, the accumulation of these unphosphorylated substrates begins to occupy the kinase, reducing free kinase concentration and thus reducing the “effective  $r$ ” of the system. In the limit where  $N$  is large, the occupation increases until the kinase is completely saturated, ultimately leading to very low phosphorylation at  $r_1 < 1$ . For  $r_1 > 1$ , a similar situation holds, but with the phosphatase occupied by the  $S_i^*$ ’s.

#### 4 Analytical Results for the 1–Kinase/2–Phosphatase Loop

In this section we will show that  $S_1$  phosphorylation always increases in  $[S_2]_0$  in the limit in which  $[S_1]_0 \ll K_m$ . In this system  $S_1^*$  can be derived in a similar fashion to that for the 1K1P loop, resulting in:

$$S_1^* = \frac{(r_1 - 1) - (\alpha_{K,1}K_{K,1} + r_1K_{P,1}) + \sqrt{((r_1 - 1) - (\alpha_{K,1}K_{K,1} + r_1K_{P,1}))^2 + 4(r_1 - 1)r_1K_{P,1}}}{2(r_1 - 1)} \quad (4.0.1)$$

Note this is similar to 2.2.4, the difference being the absence of  $\alpha_{P,1}$ . This is because in this loop the substrates only share a kinase, making  $\alpha_{P,1} = 1$ . As such,  $\frac{\partial S_1^*}{\partial \alpha_{P,1}} = 0$ , by the chain rule we see:

$$\frac{dS_1^*}{d[S_2]_0} = \frac{dS_1^*}{d\alpha_{K,1}} \cdot \frac{d\alpha_{K,1}}{d[S_2]} \cdot \frac{d[S_2]}{d[S_2]_0} \quad (4.0.2)$$

Note that  $\frac{dS_1^*}{d\alpha_{K,1}}$  is similar to  $\frac{\partial S_1^*}{\partial \alpha_{K,1}}$  (2.3.4), the only difference being  $\alpha_{P,1} = 1$  in this case. Since the value of  $\alpha_{P,1}$  does not have an affect on the sign of  $\frac{\partial S_1^*}{\partial \alpha_{K,1}}$ , we can conclude that  $\frac{dS_1^*}{d\alpha_{K,1}} < 0$  for any value of  $r_1$  (see subsection 2.3). Additionally, we can easily show  $\frac{d\alpha_{K,1}}{d[S_2]} > 0$ :

$$\begin{aligned} \alpha_{K,1} &= 1 + \frac{[S_2]}{K_{m,K,2}} \\ \frac{d\alpha_{K,1}}{d[S_2]} &= \frac{1}{K_{m,K,2}} > 0 \end{aligned} \quad (4.0.3)$$

#### 4.1 $d[S_2]/d[S_2]_0$ is always positive

Using Mathematica [3], we can obtain an expression for  $\frac{d[S_2]}{d[S_2]_0}$  at  $r_2 \neq 1$ . To simplify the derivation, we assume  $[S_1]_0 \ll K_m$  so that  $\alpha_{K,2} = 1$ .

$$\begin{aligned}
[S_2] &= (1 - S_2^*)[S_2]_0 \\
\frac{d[S_2]}{d[S_2]_0} &= 1 - S_2^* - \frac{dS_2^*}{d[S_2]_0}[S_2]_0 \\
&= 1 - \frac{-x' + \sqrt{(x')^2 + y'}}{2(r_2 - 1)} - \frac{z' + \frac{z'(-z') - \frac{y'}{2}}{\sqrt{(x')^2 + y'}}}{2(r_1 - 1)} \\
&= \frac{2(r_2 - 1) + x' - \sqrt{(x')^2 + y'} - z' + \frac{x'z' + \frac{y'}{2}}{\sqrt{(x')^2 + y'}}}{2(r_2 - 1)} \tag{4.1.1}
\end{aligned}$$

In which:

$$x' \equiv -((r_2 - 1) - (K_{K,2} + r_2 K_{P,2})), \quad y' \equiv 4(r_2 - 1)r_2 K_{P,2}, \quad z' \equiv K_{K,2} + r_2 K_{P,2} \tag{4.1.2}$$

By the definitions of  $x'$  and  $z'$  we notice that  $x' = -(r_2 - 1) + z'$ , which can be substituted into 4.1.1:

$$\begin{aligned}
\frac{d[S_2]}{d[S_2]_0} &= \frac{2(r_2 - 1) - (r_2 - 1) + z' - \sqrt{(x')^2 + y'} - z' + \frac{x'z' + \frac{y'}{2}}{\sqrt{(x')^2 + y'}}}{2(r_2 - 1)} \\
&= \frac{(r_2 - 1) - \sqrt{(x')^2 + y'} + \frac{x'z' + \frac{y'}{2}}{\sqrt{(x')^2 + y'}}}{2(r_2 - 1)} \\
&= \frac{(r_2 - 1)\sqrt{(x')^2 + y'} - (x')^2 - y' + x'z' + \frac{y'}{2}}{2(r_2 - 1)\sqrt{(x')^2 + y'}} \tag{4.1.3}
\end{aligned}$$

Additionally, by the definitions of  $x'$  and  $z'$ , we see  $(x')^2 = (r_2 - 1)^2 - 2(r_2 - 1)z' + (z')^2$  and  $x'z' = -(r_2 - 1)z' + (z')^2$ , which can be substituted into 4.1.3:

$$\begin{aligned}
\frac{d[S_2]}{d[S_2]_0} &= \frac{(r_2 - 1)\sqrt{(x')^2 + y'} - (r_2 - 1)^2 + 2(r_2 - 1)z' - (z')^2 - (r_2 - 1)z' + (z')^2 - \frac{y'}{2}}{2(r_2 - 1)\sqrt{(x')^2 + y'}} \\
&= \frac{(r_2 - 1)\sqrt{(x')^2 + y'} - (r_2 - 1)^2 + (r_2 - 1)z' - \frac{y'}{2}}{2(r_2 - 1)\sqrt{(x')^2 + y'}} \\
&= \frac{\sqrt{(x')^2 + y'} - (r_2 - 1) + z' - 2r_2 K_{P,2}}{2\sqrt{(x')^2 + y'}} \\
&= \frac{\sqrt{(x')^2 + y'} + x' - 2r_2 K_{P,2}}{2\sqrt{(x')^2 + y'}} \tag{4.1.4}
\end{aligned}$$

We can show that  $\frac{d[S_2]}{d[S_2]_0} > 0$  for all values of  $r_2$  by assuming the opposite:

$$\begin{aligned} \frac{d[S_2]}{d[S_2]_0} &= \frac{\sqrt{(x')^2 + y'} + x' - 2r_2 K_{P,2}}{2\sqrt{(x')^2 + y'}} < 0 \\ \sqrt{(x')^2 + y'} + x' - 2r_2 K_{P,2} &< 0 \\ \sqrt{(x')^2 + y'} &< -x' + 2r_2 K_{P,2} \end{aligned} \quad (4.1.5)$$

If the right hand side of 4.1.5 is negative then we have already arrived at a contradiction. Otherwise we can square both sides without loss of information:

$$(x')^2 + y' < (x')^2 - 4r_2 K_{P,2} x' + 4(r_2 K_{P,2})^2 \quad (4.1.6)$$

$$\begin{aligned} y' &< -4r_2 K_{P,2} x' + 4(r_2 K_{P,2})^2 \\ 4(r_2 - 1)r_2 K_{P,2} &< 4(r_2 - 1)r_2 K_{P,2} - 4r_2 K_{K,2} K_{P,2} - 4(r_2 K_{P,2})^2 + 4(r_2 K_{P,2})^2 \\ 0 &< -4r_2 K_{K,2} K_{P,2} \end{aligned} \quad (4.1.7)$$

Which is clearly impossible, indicating  $\frac{d[S_2]}{d[S_2]_0} > 0$  for  $r_2 \neq 1$ . Next we can obtain an expression for  $\frac{d[S_2]}{d[S_2]_0}$  at  $r_2 = 1$ . At this point,  $S_2^*$  becomes:

$$S_2^* = \frac{K_{m,P,2}}{K_{m,K,2} + K_{m,P,2}} \quad (4.1.8)$$

As such, we can easily see that the derivative of 4.1.8 with respect to  $[S_2]_0$  is equal to zero. Applying this to the previous expression for  $\frac{d[S_2]}{d[S_2]_0}$  (4.1.1) we notice that at  $r_2 = 1$ :

$$\frac{d[S_2]}{d[S_2]_0} = 1 - S_2^* \quad (4.1.9)$$

Since  $S_2^*$  must be a value between 0 and 1, it is easy to see that  $\frac{d[S_2]}{d[S_2]_0} > 0$  at  $r_2 = 1$ , thus showing that  $\frac{d[S_2]}{d[S_2]_0} > 0$  for all values of  $r_2$ .

## 4.2 $dS_1^*/d[S_2]_0$ is always negative

As previously shown, we can use the chain rule to define  $\frac{dS_1^*}{d[S_2]_0}$  within this motif as:

$$\frac{dS_1^*}{d[S_2]_0} = \frac{dS_1^*}{d\alpha_{K,1}} \cdot \frac{d\alpha_{K,1}}{d[S_2]} \cdot \frac{d[S_2]}{d[S_2]_0} \quad (4.2.1)$$

In which  $\frac{dS_1^*}{d\alpha_{K,1}} < 0$ ,  $\frac{d\alpha_{K,1}}{d[S_2]} > 0$  and  $\frac{d[S_2]}{d[S_2]_0} > 0$ . Now we can see that  $\frac{dS_1^*}{d[S_2]_0} < 0$  for all values of  $r_1$  and  $r_2$ . At  $r_2 < 1$ ,  $\alpha_{K,1} > 1$  as most  $S_2$  will be in the unphosphorylated form. Once  $r_2 > 1$ ,  $S_2$  switches to its phosphorylated form, relieving the pressure on  $S_1$  through  $\alpha_{K,1}$ , establishing the “gatekeeper” effect. We can see  $\alpha_{K,1}$  approaches 1 as  $r_2 \rightarrow \infty$ , allowing  $S_1^*$  to behave as an isolated futile cycle in this limit. Since  $S_1^*$  is increasing in  $r_2$ , we can conclude that  $S_2$  decreases



$S_1^*$  for all values of  $r_2$  except in the limit  $r_2 \rightarrow \infty$ .

## 5 Analytical Results for the 2–Kinase/1–Phosphatase Loop

In this section we will show that  $S_1$  phosphorylation also always increases in  $[S_2]_0$  regardless of any other parameters. In this system  $S_1^*$  can be derived in a similar fashion to that for the 1K1P loop, resulting in:

$$S_1^* = \frac{(r_1 - 1) - (K_{K,1} + r_1\alpha_{P,1}K_{P,1}) + \sqrt{((r_1 - 1) - (K_{K,1} + r_1\alpha_{P,1}K_{P,1}))^2 + 4(r_1 - 1)r_1\alpha_{P,1}K_{P,1}}}{2(r_1 - 1)} \quad (5.0.1)$$

Which is equivalent to 2.2.4, the only difference being the lack of  $\alpha_{K,1}$ . As such  $\frac{\partial S_1^*}{\partial \alpha_{K,1}} = 0$ , and we notice that by the chain rule:

$$\frac{dS_1^*}{d[S_2]_0} = \frac{dS_1^*}{d\alpha_{P,1}} \cdot \frac{d\alpha_{P,1}}{d[S_2]_0} \cdot \frac{d[S_2^*]}{d[S_2]_0} \quad (5.0.2)$$

Note that  $\frac{dS_1^*}{d\alpha_{P,1}}$  is similar to  $\frac{\partial S_1^*}{\partial \alpha_{P,1}}$  (2.3.7), the only difference being  $\alpha_{K,1} = 1$  in this case. Since the value of  $\alpha_{K,1}$  does not have an affect on the sign of  $\frac{\partial S_1^*}{\partial \alpha_{P,1}}$ , we can conclude that  $\frac{dS_1^*}{d\alpha_{P,1}} > 0$  for any value of  $r_1$  (see subsection 2.3). Additionally, we can easily show  $\frac{d\alpha_{P,1}}{d[S_2]_0} > 0$ :

$$\begin{aligned} \alpha_{P,1} &= 1 + \frac{[S_2^*]}{K_{m,P,2}} \\ \frac{d\alpha_{P,1}}{d[S_2]_0} &= \frac{1}{K_{m,P,2}} \end{aligned} \quad (5.0.3)$$

### 5.1 $d[S_2^*]/d[S_2]_0$ is always positive

We can define  $[S_2^*]$  as:

$$[S_2^*] = S_2^*[S_2]_0 \quad (5.1.1)$$

And as such  $\frac{d[S_2^*]}{d[S_2]_0}$  is:

$$\frac{d[S_2^*]}{d[S_2]_0} = S_2^* + \frac{dS_2^*}{d[S_2]_0}[S_2]_0 \quad (5.1.2)$$

Notice that  $\frac{d[S_2^*]}{d[S_2]_0} = 1 - \frac{d[S_2]}{d[S_2]_0}$  (see 4.1.1). We can then substitute 4.1.4 in for  $\frac{d[S_2]}{d[S_2]_0}$ :

$$\begin{aligned}\frac{d[S_2^*]}{d[S_2]_0} &= 1 - \frac{\sqrt{(x')^2 + y'} + x' - 2r_2 K_{P,2}}{2\sqrt{(x')^2 + y'}} \\ &= \frac{\sqrt{(x')^2 + y'} - x' + 2r_2 K_{P,2}}{2\sqrt{(x')^2 + y'}}\end{aligned}\tag{5.1.3}$$

We can show  $\frac{d[S_2^*]}{d[S_2]_0} > 0$  for any value of  $r_2$  by assuming the opposite:

$$\begin{aligned}\frac{d[S_2^*]}{d[S_2]_0} &= \frac{\sqrt{(x')^2 + y'} - x' + 2r_2 K_{P,2}}{2\sqrt{(x')^2 + y'}} < 0 \\ \sqrt{(x')^2 + y'} - x' + 2r_2 K_{P,2} &< 0 \\ \sqrt{(x')^2 + y'} &< x' - 2r_2 K_{P,2}\end{aligned}\tag{5.1.4}$$

If the right hand side of 5.1.4 is negative then we have already arrived at a contradiction. Otherwise we can square both sides without loss of information:

$$(x')^2 + y' < (x')^2 - 4r_2 K_{P,2} x' + 4(r_2 K_{P,2})^2\tag{5.1.5}$$

Note that this expression is the same as 4.1.6, which we have already shown to be impossible, supporting the conclusion  $\frac{d[S_2^*]}{d[S_2]_0} > 0$  for  $r_2 \neq 0$ . Next we can obtain an expression for  $\frac{d[S_2]}{d[S_2]_0}$  at  $r_2 = 1$ . At this point,  $S_2^*$  becomes:

$$S_2^* = \frac{K_{m,P,2}}{K_{m,K,2} + K_{m,P,2}}\tag{5.1.6}$$

As such, we can easily see that the derivative of 5.1.6 with respect to  $[S_2]_0$  is equal to zero. Applying this to the previous expression for  $\frac{d[S_2]}{d[S_2]_0}$  (5.1.2) we notice that at  $r_2 = 1$ :

$$\frac{d[S_2^*]}{d[S_2]_0} = S_2^*\tag{5.1.7}$$

Since  $S_2^*$  must be a value between 0 and 1, it is easy to see that  $\frac{d[S_2^*]}{d[S_2]_0} > 0$  at  $r_2 = 1$ , thus showing that  $\frac{d[S_2^*]}{d[S_2]_0} > 0$  for all values of  $r_2$ .

## 5.2 $dS_1^*/d[S_2]_0$ is always positive

As previously shown, we can use the chain rule to define  $\frac{dS_1^*}{d[S_2]_0}$  within this motif as:

$$\frac{dS_1^*}{d[S_2]_0} = \frac{dS_1^*}{d\alpha_{P,1}} \cdot \frac{d\alpha_{P,1}}{d[S_2^*]} \cdot \frac{d[S_2^*]}{d[S_2]_0}\tag{5.2.1}$$

In which  $\frac{dS_1^*}{d\alpha_{P,1}} > 0$ ,  $\frac{d\alpha_{P,1}}{d[S_2^*]} > 0$  and  $\frac{d[S_2^*]}{d[S_2]_0} > 0$ . Now we can see that  $\frac{dS_1^*}{d[S_2]_0} > 0$  for all values of  $r_1$  and  $r_2$ .

## References

1. Goldbeter A, K. D., 1981. An amplified sensitivity arising from covalent modification in biological systems. *Proc Natl Acad Sci U S A* 78:6840–44.
2. Nelson, D. L., and M. M. Cox, 2008. *Lehninger Principles of Biochemistry* 5<sup>th</sup> Edition.
3. Wolfram Research, I., 2010. *Mathematica*, Version 8.0. Champaign, Illinois.
